# Supplementary material for: Insight into the structures of unusual base pairs in RNA complexes containing a primer/template/adenosine ligand
Source: Royal Society of Chemistry journal article supplement (doi:10.1039/d3cb00137g), 2023-01-01
Supplement: d3cb00137g1.pdf [file d3cb00137g1.pdf]

## Supporting Information

### Insight into the structures of unusual base pairs in RNA complexes containing primer/template/adenosine ligand

Yuliya Dantsu<sup>a</sup>, Ying Zhang<sup>a</sup> and Wen Zhang<sup>\*a</sup>

- a. Department of Biochemistry and Molecular Biology, Indiana University School of Medicine, Indianapolis, IN 46202, USA.

### CONTENTS

|                                                     |    |
|-----------------------------------------------------|----|
| 1. General Methods                                  | S2 |
| 2. Primer Extension with 2-AlpG and 2-AlpC monomers | S3 |
| 3. X-ray Crystallographic Studies                   | S4 |

## **1. General Methods**

**1.1 General Information.** All chemicals were purchased from Fisher Scientific, VWR or Sigma-Aldrich (St. Louis, MO). 2-aminoimidazole HCl was purchased from CombiBlocks, Inc. (San Diego, CA). All the nucleoside phosphoramidites for solid-phase synthesis were from Chemgenes Corporation or Glen Research. All the screening buffers for crystallization are from Hampton Research and Jena Bioscience. The syntheses of Adenosine-5'-O-phosphoro-(2-aminoimidazole) (2-AlpA) and Guanosine-5'-O-phosphoro-(2-aminoimidazole) (2-AlpG) followed the reported protocol<sup>[1]</sup>.

### **1.2 Determination of RNA concentration**

Concentrations of the aqueous RNA samples were determined by their UV absorption at 260 nm on a Thermo Scientific Nanodrop 2000c Spectrophotometer (Waltham, MA). The theoretical molar extinction coefficients of these samples at 260 nm were provided by Integrated DNA Technologies, Inc..

### **1.3 RNA primer extension**

RNA primer and template were pre-mixed in 20  $\mu$ L of a solution containing 200 mM HEPES buffer, pH 8.0, 1  $\mu$ M primer and 5  $\mu$ M template and 50 mM  $MgCl_2$ . The primer extension reaction was initiated by adding the activated monomers (2-AlpA and 2-AlpG) from 100 mM stock solutions to a final concentration of 10 mM in the reaction. At the indicated time points, 2  $\mu$ L aliquots were taken from the reaction and quenched with 28  $\mu$ L of 90 % (v/v) aqueous formamide containing 15 mM EDTA. Samples were heated at 95 °C for 2 min, cooled to room temperature, and analysed on 18 % (19:1) denaturing PAGE gels containing 7 M urea. Gels were imaged using a Bio-Rad ChemiDoc™ Imager. The resulting gel images were analysed using ImageJ software. The reactions were repeated by triplicate experiments.

### **1.4 Crystallization**

The locked nucleotides-containing RNA samples (0.5 mM duplex) were mixed with different binding ligands (20 mM), heated to 90 °C for 2 min, then slowly cooled to 4 °C prior to crystallization. The sitting drop vapor diffusion crystallization screening was performed using an Oryx4 Douglas Instruments robotic system. Screening conditions included Nucleic Acid Mini Screen Kits, Natrix HT, Index (Hampton Research) and Nuc-Pro-HTS (Jena Bioscience). Crystals grew at 18 °C in the vibration free IN45 Chilling/Heating Incubator (Torrey Pines Scientific).

**1.5 Data collection, structure determination and refinement.** Crystals were mounted using CrystalCap™ SPINE HT with CryoLoops (Hampton Research). Crystals were soaked for 2 min in a drop of mother liquor solution which contained 30% glycerol as a cryo-protectant, before dipped into liquid nitrogen.

Diffraction data were collected at a wavelength of 1 Å under a liquid nitrogen stream at -174 °C at the Life Sciences Collaborative Access Team (LS-CAT) beamline 21-ID-D at the Advanced Photon Source, Argonne National Laboratory (USA). The crystals were exposed for 0.1 s per image with a 0.2° oscillation angle. The distances between detector and the crystal were set to 100-300 mm. Raw diffraction data was processed using HKL2000 and DENZO/SCALEPACK. The structure was determined by molecular replacement using the published structure (PDB code 6c8l) as search model. The structure was refined using Refmac<sup>[2]</sup> in the CCP4 suite. The refinement protocol included simulated annealing, positional refinement, restrained B-factor refinement, and bulk solvent correction. The topologies and parameters for synthetic for locked nucleotides *m*C(LCC), G(LCG), T(LNT), GpppA (GA3), and dinucleotide intermediate (GMA) were created using ProDrg<sup>[3]</sup> in CCP4 suite and applied during refinement. After several cycles of refinement, a number of ordered waters and metals were added.

## 2. Primer extension with 2-AlpG and 2-AlpC monomers.

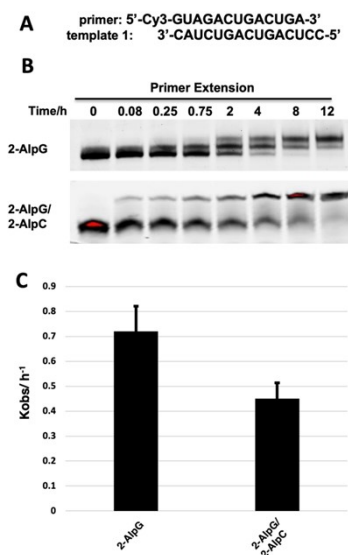

Figure S1. (A) Sequences of primer and templates used in the primer extension. (B) PAGE analysis of the reaction products over different times using 2-AlpG monomer as substrate, compared to 2-AlpG and 2-AlpC monomers as substrate. Gels depicted are representative of triplicate experiments. (C) Comparison of pseudo-first order rates of the two reactions.

**3. X-ray Crystallographic Studies.** Optimal crystallization conditions, data collection, phasing, and refinement statistics of the determined structures are listed in Tables S1, S2 and S3.

**Table S1. Optimized conditions for crystallization of RNA-monomer complexes**

| entry | Binding template          | ligands  | Optimized crystallization conditions                                                                                                                                                      |
|-------|---------------------------|----------|-------------------------------------------------------------------------------------------------------------------------------------------------------------------------------------------|
| 1     | 5'- <i>TT</i>             | AMP      | 10% v/v MPD, 0.040 M sodium cacodylate trihydrate, pH 7.0, 0.012 M spermine tetrahydrochloride, 0.020 M magnesium chloride hexahydrate                                                    |
| 2     | 5'- <i>T<sub>m</sub>C</i> | AMP/GMP  | 10% v/v MPD, 0.040 M sodium cacodylate trihydrate, pH 7.0, 0.012 M Spermine tetrahydrochloride, 0.08 M sodium chloride, 0.012 M potassium chloride, 0.02 M magnesium chloride hexahydrate |
| 3     | 5'- <i>T<sub>m</sub>C</i> | ApppG    | 0.02 M magnesium chloride hexahydrate, 0.05 M MOPS, pH 7.0, 55% v/v Tacsimate, pH 7.0, 2 mM hexamine cobalt(III) chloride                                                                 |
| 4     | 5'- <i>-mCT</i>           | ApppG    | 0.05 M magnesium sulfate hydrate, 0.05 M HEPES sodium, pH 7.0, 1.6 M lithium sulfate monohydrate                                                                                          |
| 5     | 5'- <i>CC</i>             | ApppG    | 0.1 M Bis-Tris, pH 6.5, 2 M ammonium sulfate                                                                                                                                              |
| 6     | 5'- <i>T<sub>m</sub>C</i> | Ap-AI-pG | 0.5 M ammonium sulfate, 0.1 M sodium citrate tribasic dihydrate, pH 5.6, 1.0 M lithium sulfate monohydrate                                                                                |

**Table S2. Data collection statistics.**

| Structure                        | 1                                   | 2                                   | 3                                  |
|----------------------------------|-------------------------------------|-------------------------------------|------------------------------------|
| Space group                      | P321                                | P321                                | P321                               |
| Unit cell parameters (Å, °)      | 43.84, 43.84, 82.84,<br>90, 90, 120 | 43.53, 43.53, 80.14,<br>90, 90, 120 | 44.12, 44.12, 84.53<br>90, 90, 120 |
| Resolution range, Å (last shell) | 50-1.90 (1.97-1.90)                 | 50-1.45 (1.45-1.5)                  | 50-1.64 (1.7-1.64)                 |
| Unique reflections               | 7680                                | 15931                               | 10994                              |
| Completeness, %                  | 100 (100)                           | 98.5 (100)                          | 90.1 (100)                         |
| $R_{\text{merge}}$ , %           | 8.7 (50.1)                          | 12.2 (53.1)                         | 13.6 (79.6)                        |
| $\langle I/\sigma(I) \rangle$    | 28.9 (3.5)                          | 12.1 (7.9)                          | 10.8 (8.1)                         |
| Redundancy                       | 14.1 (9.1)                          | 10.7 (10.8)                         | 10.1 (10.4)                        |

| <b>Structure</b>                    | <b>4</b>                            | <b>5</b>                            | <b>6</b>                            |
|-------------------------------------|-------------------------------------|-------------------------------------|-------------------------------------|
| Space group                         | P321                                | P321                                | P3                                  |
| Unit cell parameters<br>(Å, °)      | 44.52, 44.52, 85.52,<br>90, 90, 120 | 43.54, 43.54, 84.27,<br>90, 90, 120 | 43.66, 43.66, 81.13,<br>90, 90, 120 |
| Resolution range, Å<br>(last shell) | 50-1.95 (2.02-1.95)                 | 50-1.5 (1.55-1.5)                   | 50-1.76 (1.82-1.76)                 |
| Unique reflections                  | 6922                                | 15337                               | 15744                               |
| Completeness, %                     | 100 (90.8)                          | 99.8 (98.8)                         | 91.9 (100)                          |
| $R_{\text{merge}}$ , %              | 13.8 (41.3)                         | 8.4 (56.4)                          | 9.9 (57.7)                          |
| $\langle I/\sigma(I) \rangle$       | 10 (13.5)                           | 21.2 (3.7)                          | 19.6 (2.3)                          |
| Redundancy                          | 8.9 (9.4)                           | 10.2 (8)                            | 5.5 (5.5)                           |

**Table S3. Structure refinement statistics.**

| <b>Structure</b>                     | <b>1</b> | <b>2</b>  | <b>3</b>   |
|--------------------------------------|----------|-----------|------------|
| PDB code                             | 8SXL     | 8SX6      | 8SWO       |
| RNA duplex per asymmetric unit       | 1        | 1         | 1          |
| Resolution range, Å                  | 38-1.9   | 26.7-1.45 | 28.19-1.64 |
| $R_{\text{work}}$ , %                | 21.7     | 22        | 24.8       |
| $R_{\text{free}}$ , %                | 26.1     | 24.2      | 24.9       |
| Number of reflections                | 7205     | 15101     | 10409      |
| Bond length R.M.S. (Å)               | 0.009    | 0.028     | 0.023      |
| Bond angle R.M.S.                    | 1.794    | 3.611     | 3.845      |
| Average B-factors, (Å <sup>2</sup> ) | 30.9     | 27.9      | 35.9       |

| <b>Structure</b>                     | <b>4</b>   | <b>5</b>  | <b>6</b>   |
|--------------------------------------|------------|-----------|------------|
| PDB code                             | 8SX5       | 8SWG      | 8SY1       |
| RNA duplex per<br>asymmetric unit    | 1          | 1         | 2          |
| Resolution range, Å                  | 28.52-1.95 | 37.74-1.5 | 34.29-1.76 |
| $R_{\text{work}}$ , %                | 28.4       | 21.8      | 22.4       |
| $R_{\text{free}}$ , %                | 32.3       | 26.6      | 25.6       |
| Number of reflections                | 6597       | 14486     | 14945      |
| Bond length R.M.S. (Å)               | 0.019      | 0.021     | 0.022      |
| Bond angle R.M.S.                    | 3.688      | 3.254     | 2.837      |
| Average B-factors, (Å <sup>2</sup> ) | 26.94      | 27.18     | 25.78      |

- [1] L. Li, N. Prywes, C. P. Tam, D. K. O'flaherty, V. S. Lelyveld, E. C. Izgu, A. Pal, J. W. Szostak, *J. Am. Chem. Soc.* **2017**, *139*, 1810-1813.
- [2] G. N. Murshudov, P. Skubák, A. A. Lebedev, N. S. Pannu, R. A. Steiner, R. A. Nicholls, M. D. Winn, F. Long, A. A. Vagin, *Acta Crystallogr. D* **2011**, *67*, 355-367.
- [3] A. W. Schüttelkopf, D. M. Van Aalten, *Acta Crystallogr. D* **2004**, *60*, 1355-1363.
